# Supplementary material
Source: PubMed Central journal article supplement (PMC4012581)
Supplement: supp_pp.114.237883_237883sup_2.pdf [file supp_pp.114.237883_237883sup_2.pdf]

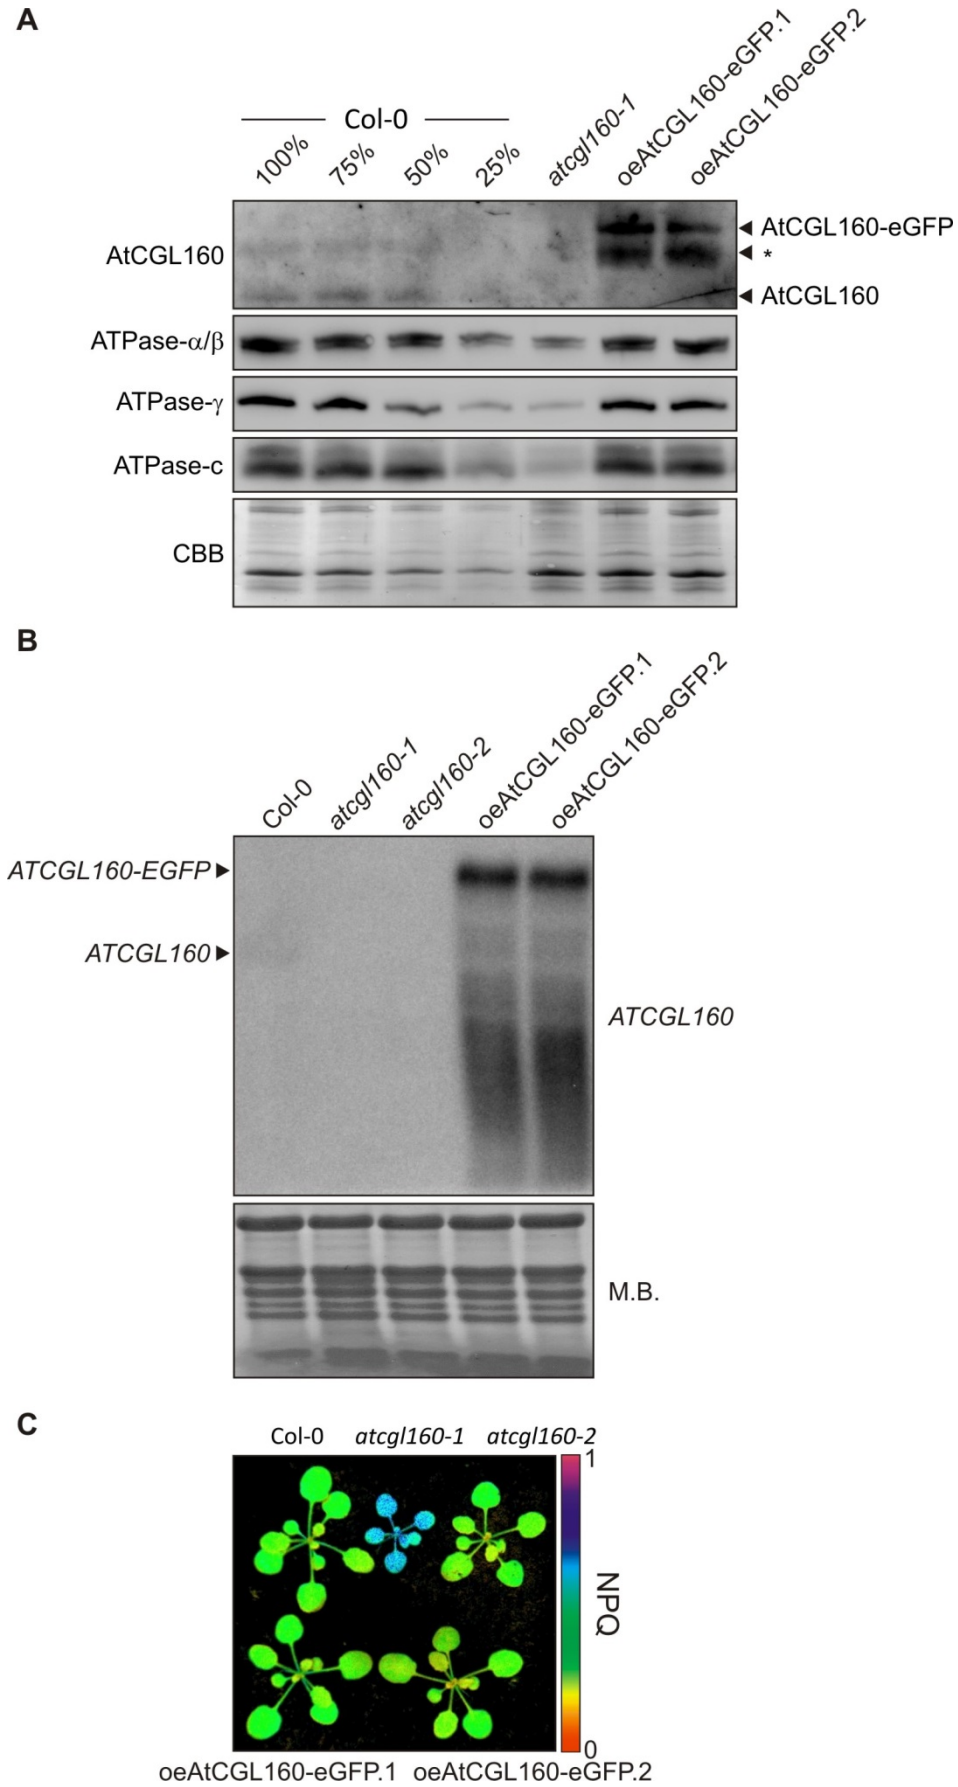

**Supplemental Figure 1.** AtCGL160-eGFP.1 complements the *atcg1160-1* mutation. A, Immunodetection of AtCGL160 and the cpATPase subunits  $\alpha/\beta$ ,  $\gamma$  and c in thylakoid

preparations from the two AtCGL160-eGFP overexpressor lines and from *atcgl160-1*, together with different amounts of similar WT (Col-0) extracts. After thylakoid extraction and fractionation on SDS gels, proteins on PVDF membranes were reversibly stained with Coomassie brilliant blue G250 (CBB) as a loading control. The asterisk marks a signal which might derive from degradation of the fusion protein AtCGL160-eGFP. B, *AtCGL160* transcript detection by Northern analyses in the same genotypes as in panel A. Total RNA was isolated from 4- to 6-week-old leaves and separated on a denaturing RNA gel. After transfer, the nitrocellulose membrane was stained with methylene blue (M.B.). After hybridization with a <sup>32</sup>P-labeled probe (see Supplemental Table 2 online for primer information) specific for the *AtCGL160* transcript, signals were detected using the Typhoon® (Amersham Biosciences) system. C, Restoration of WT NPQ levels in oeAtCGL160-eGFP lines. The two oeAtCGL160-eGFP lines, together with *atcgl160-1*, *atcgl160-2* and WT (Col-0) plants, were subjected to Imaging-PAM analyses for Y(NPQ) determination (see Methods). NPQ values are visualized in false color on a scale from 0 to 1 shown to the right of the panel.

**Supplemental Table 1.** *Coregulation of AtCGL160 with photosynthesis-related genes.*

Data were obtained from the ATTED database. Detailed information on the calculation of the coregulation factors New Rank (NR), Average Mutual Rank to Query Loci (AMR) and Average Correlation to Query Loci (AC) is available on the ATTED homepage ([www.atted.jp](http://www.atted.jp)). The other columns list the gene locus, the putative subcellular localization of the gene product (C, chloroplast; M, mitochondrion; Y, cytosol; O, others; according to TargetP and WoLF PSORT) and its function.

| NR  | AMR | AC   | Gene locus | Target | Function                                                                      |
|-----|-----|------|------------|--------|-------------------------------------------------------------------------------|
| 1   | 1   | 0.86 | At4g27800  | M, C   | Chloroplast protein phosphatase TAP38/PPH1                                    |
| 7   | 4   | 0.83 | At3g15840  | C, M   | PIFI (post-illumination chlorophyll fluorescence increase protein)            |
| 10  | 7   | 0.85 | At1g20020  | C, C   | FNR2 (ferredoxin-NADP <sup>+</sup> -oxidoreductase 2)                         |
| 19  | 14  | 0.77 | At1g08550  | O, Y   | NPQ1 (violaxanthin de-epoxidase)                                              |
| 63  | 57  | 0.78 | At1g18730  | C, Y   | NDF6 (NDH dependent flow 6 protein)                                           |
| 92  | 76  | 0.72 | At2g28800  | C, C   | ALB3 (ALBINO 3)                                                               |
| 103 | 85  | 0.76 | At5g66190  | C, C   | FNR1 (ferredoxin-NADP <sup>+</sup> -oxidoreductase 1)                         |
| 119 | 97  | 0.76 | At3g16250  | C, C   | NDF4 (NDH-dependent cyclic electron flow 1)                                   |
| 126 | 103 | 0.75 | At1g70760  | C, C   | CRR23 (chlororespiratory reduction 23)                                        |
| 138 | 111 | 0.75 | At4g332260 | C, C   | cpATPase-b/b'                                                                 |
| 141 | 113 | 0.60 | At4g11960  | C, C   | PGRL1B (PGR5-like1B)                                                          |
| 143 | 114 | 0.75 | At5g23120  | C, C   | HCF136                                                                        |
| 158 | 128 | 0.74 | At2g20260  | C, C   | PsaE2 (PSI subunit E2);                                                       |
| 171 | 138 | 0.67 | At4g00895  | C, C   | cpATPase- $\delta$                                                            |
| 219 | 174 | 0.73 | At1g15980  | C, C   | NDF1 (NDH-dependent cyclic electron flow 1/ NAD(P)H dehydrogenase subunit 48) |
| 262 | 198 | 0.71 | At4g04640  | C, C   | cpATPase- $\gamma$ 1 (or AtpC1)                                               |

**Supplemental Table 2.** *Primers used in this study.*

Overhangs which are necessary for cloning are underlined.

| Gene                               | Forward primer                                                            | Reverse primer                                                           | Application                                                                |
|------------------------------------|---------------------------------------------------------------------------|--------------------------------------------------------------------------|----------------------------------------------------------------------------|
| <i>atcgl160-1</i> (T-DNA junction) | AAGTTAAGATTCCATTTTCG<br>CATC                                              | TCCCTAAACATCACATCCTG<br>C                                                | Genotyping                                                                 |
| <i>atcgl160-2</i> (T-DNA junction) | GAGTACAATCAATTTTCCTT<br>GTGGACTTG                                         | TGATCCATGTAGATTTCCCG<br>GACATGAAG                                        | Genotyping                                                                 |
| <i>AtCGL160</i>                    | CTTTAGCAGAGTTATGAGTC                                                      | CAATAGCCTTACTCATTTCG                                                     | Amplicon 2 (see Figure 1)                                                  |
| <i>AtCGL160</i>                    | TACCCAATAAGAAACCTGA<br>G                                                  | TAAGTCTGTGGAAGTAATGG                                                     | Amplicon 1 (see Figure 1)                                                  |
| <i>AtCGL160</i>                    | <u>GGGGACAAGTTTGTACAAA</u><br><u>AAAGCAGGCTCAATGGCGA</u><br>TTCTTAGTTACAT | <u>GGGGACCACTTTGTACAAGA</u><br><u>AAGCTGGGTGATCACTGGCC</u><br>TGTGTGTCTG | <i>AtCGL160</i> cloning (pB7FWG2.0) for complementation                    |
| <i>AtpC</i>                        | <u>CACCGCTTCCTCTGTTTCAC</u><br>CACTCCAAGCG                                | TCAAACCTGTGCATTAGCTC<br>CAGCA                                            | <i>AtpC</i> TOPO cloning (pET151) for overexpression in <i>E. coli</i>     |
| <i>AtCGL160</i>                    | <u>CACCGGAGAGTACGGTGGT</u><br>CCTCC                                       | TTATACTTCTGGGTCACCAC<br>GTG                                              | <i>AtCGL160</i> TOPO cloning (pET151) for overexpression in <i>E. coli</i> |
| <i>atpA</i>                        | GACAGACAGACCGGTAAAA<br>C                                                  | AAACATCTCCTGACTGGGTC                                                     | Northern probe                                                             |
| <i>atpB</i>                        | TTAGGTCCTGTCGATACTCG                                                      | ACCCAATAAGGCGGATACCT                                                     | Northern probe                                                             |
| <i>atpE</i>                        | GTGTA CTGACTCCGAATCGA                                                     | TATTGAGAGCCTCGACTCGT                                                     | Northern probe                                                             |
| <i>atpF</i>                        | TCGTTTACTTGGGTCACTGG                                                      | TTGTTGGAAAACCCGTTTCGC                                                    | Northern probe                                                             |
| <i>atpH</i>                        | GAATCCACTGGTTTCTGCTG                                                      | AGCGCTAATGCTACAACCAG                                                     | Northern probe                                                             |
| <i>atpI</i>                        | TATCCAGTTACCTCAAGGGG<br>AGTTA                                             | TTAATGATGACCTTCCATAG<br>ACTCA                                            | Northern probe                                                             |
| <i>AtCGL160</i>                    | CACCGGAGAGTACGGTGGT<br>CCTCC                                              | CAATAGCCTTACTCATTTCG                                                     | Northern probe                                                             |
| <i>AtCGL160</i>                    | <u>ATTAACAAGGCCATTACGGC</u><br><u>CATGAAAATCATTCTACCCA</u><br>ATAAGA      | <u>AACTGATTGGCCGAGGCGG</u><br><u>CCCCATCACTGGCCTGTGTG</u><br>TCTGGAG     | pAMBV4 cloning for split-ubiquitin assays,                                 |

|                      |                                                                      |                                                                             |                                                                                                  |
|----------------------|----------------------------------------------------------------------|-----------------------------------------------------------------------------|--------------------------------------------------------------------------------------------------|
| <i>AtCGL160</i>      | <u>ATTAACAAGGCCATTACGGC</u><br><u>CATGAAATTGTTTGATGATC</u><br>CTAA   | <u>AACTGATTGGCCGAGGCGG</u><br><u>CCCCATCACTGGCCTGTGTG</u><br>TCTGGAG        | AtCGL160 <sub>29-350</sub><br>pAMBV4 cloning<br>for split-ubiquitin<br>assays,                   |
| <i>AtCGL160</i>      | <u>ATTAACAAGGCCATTACGGC</u><br><u>CATGGAAGCTAAAAAGCAA</u><br>ATGAG   | <u>AACTGATTGGCCGAGGCGG</u><br><u>CCCCATCACTGGCCTGTGTG</u><br>TCTGGAG        | AtCGL160 <sub>87-350</sub><br>pAMBV4 cloning<br>for split-ubiquitin<br>assays,                   |
| <i>AtCGL160</i>      | <u>ATTAACAAGGCCATTACGGC</u><br><u>CATGAAAATCATTCTACCCA</u><br>ATAAGA | <u>CCGTTGCAACCGGTA AAAAGT</u><br><u>CAGCCCTGTCTTTAGCAGCT</u><br><u>TGTA</u> | AtCGL160 <sub>147-350</sub><br>Fusion PCR, N-<br>terminus fragment                               |
| <i>Atp1</i>          | TACAAGCTGCTAAAGACAG<br>GGCTGACTTTTACCGGTTGC<br>AACGG                 | <u>AACTGATTGGCCGAGGCGG</u><br><u>CCCCATCCGCTGCGGGCGTA</u><br>AACA           | AtCGL160 <sub>29-206</sub><br>Fusion PCR, C-<br>terminus fragment                                |
| <i>AtCGL160-Atp1</i> | <u>ATTAACAAGGCCATTACGGC</u><br><u>CATGAAAATCATTCTACCCA</u><br>ATAAGA | <u>AACTGATTGGCCGAGGCGG</u><br><u>CCCCATCCGCTGCGGGCGTA</u><br>AACA           | Atp1 <sub>1-117</sub><br>Fusion PCR for<br>AtCGL160 <sub>29-206</sub> -<br>Atp1 <sub>1-117</sub> |
